# Supplementary material for: C–H and C–C bond activation of propane to propylene and ethylene selectivity assisted by CO2 over titania catalysts
Source: Royal Society of Chemistry journal article supplement (doi:10.1039/d1nj03541j), 2021-01-01
Supplement: d1nj03541j1.pdf [file d1nj03541j1.pdf]

# Supporting Information

## **C-H and C-C bonds activation of propane to propylene and ethylene selectivity assisted by CO<sub>2</sub> over titania catalysts**

Emad N. Al-Shafei <sup>a,\*</sup>, Sai P. Katikaneni <sup>a</sup>, Hameed H. Al-Badairy <sup>a</sup>

(a): Research and Development Center, Saudi Aramco, Dhahran, Saudi Arabia

Corresponding author: [shafeien@aramco.com](mailto:shafeien@aramco.com); [emadnaji@gmail.com](mailto:emadnaji@gmail.com)

### Contents

|            |                                                                                                                                                                                 |
|------------|---------------------------------------------------------------------------------------------------------------------------------------------------------------------------------|
| Figure 1S. | XRD pattern and defect of anatase crystalline phase (1 0 1) of TiO <sub>2</sub> , 5% Zr/Ti oxide and 10.5% Ti/Ti oxide catalysts                                                |
| Figure 2S  | Time-of-stream cycle of propane conversion: 5% Zr/Ti oxide. Reaction condition: 600 °C, 1 atm, WHSV = 40 h <sup>-1</sup> , CO <sub>2</sub> /propane ratio = 20.4 molar ratio    |
| Figure 3S. | Time-of-stream cycle of propane conversion: 10.5% Ti/Ti oxide. Reaction condition: 600 °C, 1 atm, WHSV = 40 h <sup>-1</sup> , CO <sub>2</sub> /propane ratio = 20.4 molar ratio |
| Table 1S.  | Gas analysis of propane dehydrogenation assisted by CO <sub>2</sub> over 5% Zr/Ti oxide catalyst, CO <sub>2</sub> /propane molar ratio of 20.4 at 600 °C                        |
| Table 2S.  | The propane conversion, selectivity and yield over 5% Zr/Ti oxide catalyst at 600 °C                                                                                            |
| Table 3S.  | Gas analysis of propane dehydrogenation assisted by CO <sub>2</sub> over 10.5% Ti/Ti oxide catalyst, CO <sub>2</sub> /propane molar ratio of 20.4 at 600 °C                     |
| Table 4S.  | The propane conversion, selectivity and yield over 10.5% Ti/Ti oxide catalyst at 600 °C                                                                                         |

### 3. Results and Discussion

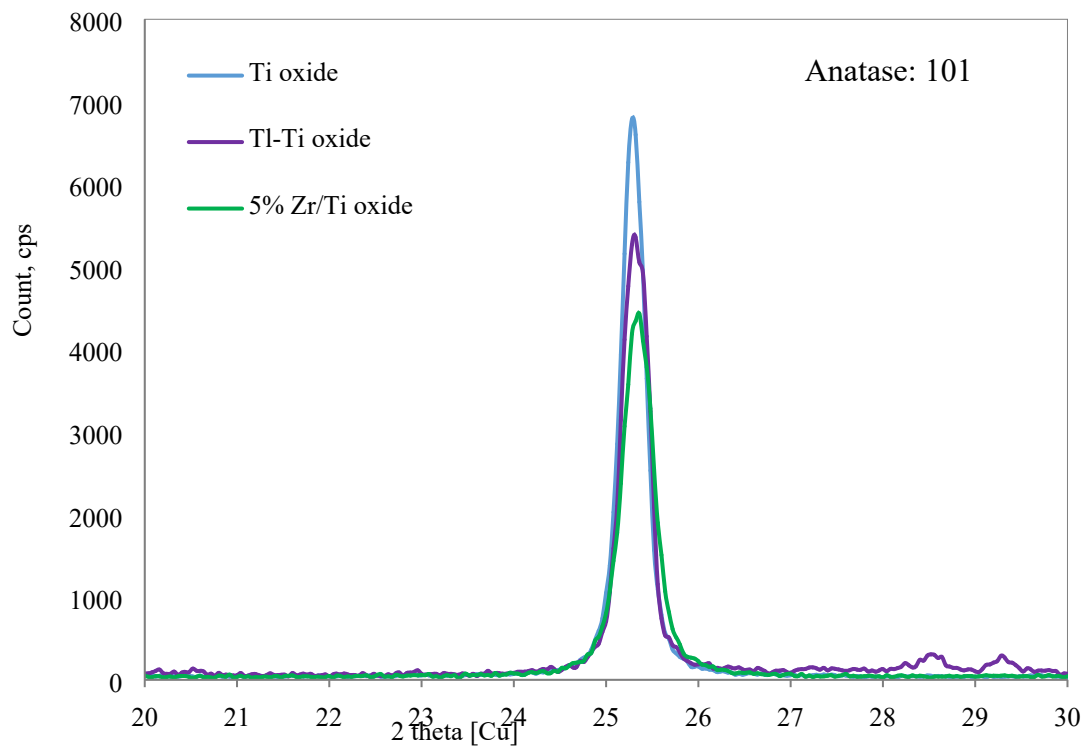

Figure S1. XRD pattern and defect of anatase crystalline phase (1 0 1) of  $\text{TiO}_2$ , 5% Zr/Ti oxide and 10.5% Tl/Ti oxide catalysts

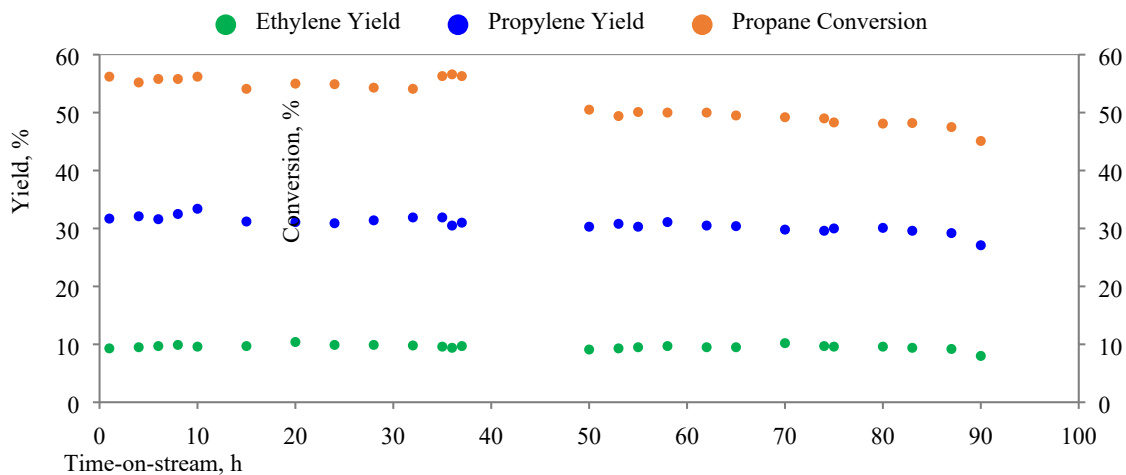

Figure S2. Time-of-stream cycle of propane conversion: 5% Zr/Ti oxide. Reaction condition:

600 °C, 1 atm, WHSV = 40 h<sup>-1</sup>, CO<sub>2</sub>/propane ratio = 20.4 molar ratio

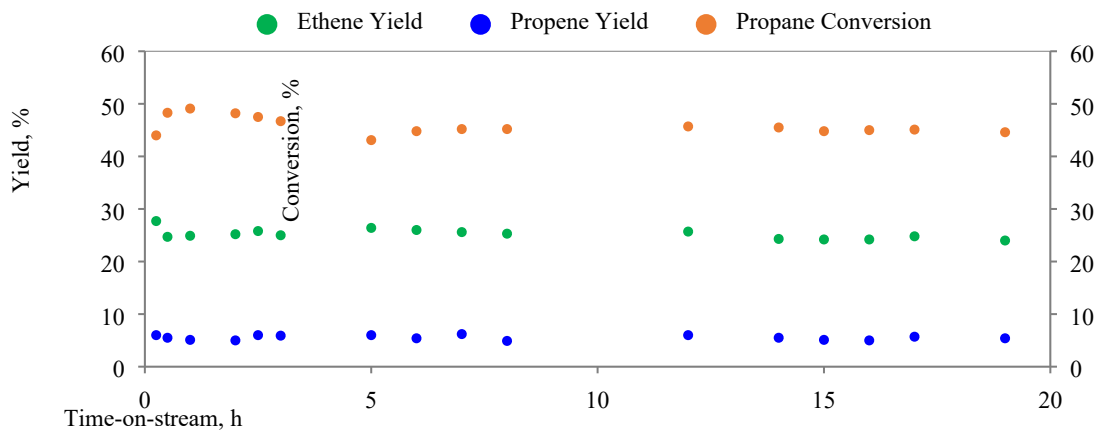

Figure S3. Time-of-stream cycle of propane conversion: 10.5% Ti/Ti oxide. Reaction condition:

600 °C, 1 atm, WHSV = 40 h<sup>-1</sup>, CO<sub>2</sub>/propane ratio = 20.4 molar ratio

Table S1. Gas analysis of propane dehydrogenation assisted by CO<sub>2</sub> over 5% Zr/Ti oxide catalyst, CO<sub>2</sub>/propane molar ratio of 20.4 at 600 °C

| Time hours | H <sub>2</sub> mol% | CO mol% | methane mol% | CO <sub>2</sub> mol% | Ethylene mol% | Ethane mol% | Propylene mol% | Propane mol% |
|------------|---------------------|---------|--------------|----------------------|---------------|-------------|----------------|--------------|
| 0          | 0.05                | 0.60    | 0.25         | 90.66                | 0.37          | 0.349       | 1.25           | 1.73         |
| 4          | 0.05                | 0.69    | 0.26         | 90.29                | 0.38          | 0.267       | 1.27           | 1.77         |
| 6          | 0.06                | 0.62    | 0.27         | 89.79                | 0.38          | 0.295       | 1.25           | 1.74         |
| 8          | 0.06                | 0.72    | 0.24         | 89.75                | 0.39          | 0.269       | 1.29           | 1.75         |
| 10         | 0.06                | 0.75    | 0.23         | 90.69                | 0.38          | 0.277       | 1.32           | 1.73         |
| 15         | 0.06                | 0.65    | 0.25         | 90.59                | 0.38          | 0.272       | 1.23           | 1.81         |
| 20         | 0.05                | 0.65    | 0.27         | 90.83                | 0.41          | 0.259       | 1.23           | 1.78         |
| 24         | 0.05                | 0.61    | 0.26         | 90.95                | 0.39          | 0.297       | 1.22           | 1.78         |
| 28         | 0.05                | 0.68    | 0.28         | 90.74                | 0.39          | 0.227       | 1.24           | 1.81         |
| 32         | 0.05                | 0.72    | 0.25         | 90.75                | 0.39          | 0.236       | 1.26           | 1.81         |
| 35         | 0.05                | 0.63    | 0.24         | 90.67                | 0.38          | 0.336       | 1.26           | 1.73         |
| 36         | 0.05                | 0.48    | 0.27         | 88.06                | 0.37          | 0.399       | 1.2            | 1.71         |
| 37         | 0.05                | 0.55    | 0.26         | 88.97                | 0.38          | 0.362       | 1.22           | 1.73         |

Table S2. The propane conversion, selectivity and yield over 5% Zr/Ti oxide catalyst at 600 °C

| Reaction Time (h) | Propene Selectivity (%) | Ethene Selectivity (%) | Propane Conversion (%) | Propylene Yield (%) | Ethylene Yield (%) | olefins Yield (%) | CO <sub>2</sub> Conversion (%) |
|-------------------|-------------------------|------------------------|------------------------|---------------------|--------------------|-------------------|--------------------------------|
| 0                 | 56.4                    | 16.5                   | 56.2                   | 31.7                | 9.3                | 41                | 5.2                            |
| 4                 | 58.2                    | 17.2                   | 55.2                   | 32.1                | 9.5                | 41.6              | 5.6                            |
| 6                 | 56.7                    | 17.3                   | 55.8                   | 31.6                | 9.7                | 41.3              | 6.1                            |
| 8                 | 58.3                    | 17.7                   | 55.8                   | 32.5                | 9.9                | 42.4              | 6.1                            |
| 10                | 59.4                    | 17.0                   | 56.2                   | 33.4                | 9.6                | 43                | 5.1                            |
| 15                | 57.8                    | 17.9                   | 54.1                   | 31.2                | 9.7                | 40.9              | 5.2                            |
| 20                | 56.6                    | 18.9                   | 55                     | 31.1                | 10.4               | 41.6              | 5.0                            |
| 24                | 56.4                    | 18.1                   | 54.9                   | 30.9                | 9.9                | 40.8              | 4.9                            |
| 28                | 57.8                    | 18.2                   | 54.3                   | 31.4                | 9.9                | 41.2              | 5.1                            |
| 32                | 59.0                    | 18.1                   | 54.1                   | 31.9                | 9.8                | 41.7              | 5.1                            |
| 35                | 56.7                    | 17.0                   | 56.3                   | 31.9                | 9.6                | 41.5              | 5.2                            |
| 36                | 53.8                    | 16.5                   | 56.6                   | 30.5                | 9.4                | 39.8              | 7.9                            |
| 37                | 55.1                    | 17.3                   | 56.3                   | 31.0                | 9.7                | 40.7              | 6.9                            |

Table S3. Gas analysis of propane dehydrogenation assisted by CO<sub>2</sub> over 10.5% Tl/Ti oxide catalyst, CO<sub>2</sub>/propane molar ratio of 20.4 at 600 °C

| Time hours | H <sub>2</sub> mol% | CO mol% | methane mol% | CO <sub>2</sub> mol% | Ethylene mol% | Ethane mol% | Propylene mol% | Propane mol% |
|------------|---------------------|---------|--------------|----------------------|---------------|-------------|----------------|--------------|
| 0          | 0.04                | 1.03    | 1.33         | 90.1                 | 1.16          | 0.19        | 0.25           | 2.35         |
| 0.5        | 0.05                | 1.02    | 1.19         | 91.0                 | 1.04          | 0.16        | 0.23           | 2.17         |
| 1          | 0.05                | 1.03    | 1.2          | 90.1                 | 1.05          | 0.16        | 0.21           | 2.14         |
| 2          | 0.04                | 1.05    | 1.28         | 88.4                 | 1.06          | 0.16        | 0.21           | 2.18         |
| 2.5        | 0.04                | 1.05    | 1.32         | 88.4                 | 1.08          | 0.17        | 0.25           | 2.2          |
| 3          | 0.04                | 1.03    | 1.23         | 90.1                 | 1.05          | 0.17        | 0.25           | 2.24         |
| 5          | 0.04                | 1.06    | 1.29         | 88.0                 | 1.11          | 0.17        | 0.25           | 2.39         |
| 6          | 0.04                | 1.06    | 1.25         | 87.5                 | 1.09          | 0.17        | 0.23           | 2.32         |
| 7          | 0.04                | 1.06    | 1.21         | 87.6                 | 1.07          | 0.15        | 0.26           | 2.3          |
| 8          | 0.05                | 1.06    | 1.2          | 87.5                 | 1.06          | 0.15        | 0.21           | 2.3          |

Table S4. The propane conversion, selectivity and yield over 10.5% Tl/Ti oxide catalyst at 600 °C

| Reaction Time (h) | Propylene Selectivity (%) | Ethylene Selectivity (%) | Propane Conversion (%) | Propylene Yield (%) | Ethylene Yield (%) | Olefins Yield (%) | CO <sub>2</sub> Conversion (%) |
|-------------------|---------------------------|--------------------------|------------------------|---------------------|--------------------|-------------------|--------------------------------|
| 0                 | 16.9                      | 80.3                     | 34.8                   | 5.9                 | 28                 | 33.9              | 3.2                            |
| 0.5               | 13.5                      | 62.5                     | 39.8                   | 5.4                 | 24.9               | 30.3              | 3.9                            |
| 1                 | 12.3                      | 61.7                     | 40.7                   | 5                   | 25.1               | 30.1              | 4.3                            |
| 2                 | 12.4                      | 63.9                     | 39.7                   | 4.9                 | 25.4               | 30.3              | 4.4                            |
| 2.5               | 15.2                      | 66.7                     | 38.9                   | 5.9                 | 26                 | 31.9              | 4.2                            |
| 3                 | 15.4                      | 66.4                     | 38.0                   | 5.8                 | 25.2               | 31.0              | -                              |
| 5                 | 17.5                      | 78.9                     | 33.8                   | 5.9                 | 26.6               | 32.5              | 1.2                            |
| 6                 | 14.9                      | 73.4                     | 35.7                   | 5.3                 | 26.2               | 31.5              | 1.1                            |
| 7                 | 16.9                      | 71.3                     | 36.2                   | 6.1                 | 25.8               | 31.9              | 1.0                            |
| 8                 | 13.4                      | 70.4                     | 36.3                   | 4.9                 | 25.5               | 30.4              | 1.0                            |
